# Supplementary material
Source: MDPI journal article supplement (https://www.mdpi.com/2227-7390/10/20/3743)
Supplement: s1 [file s1]

# Supplementary Materials: A Versatile and Efficient Novel Approach for Mendelian Randomization Analysis with Application to Assess the Causal Effect of Fetal Hemoglobin on Anemia in Sickle Cell Anemia

Janaka S. S. Liyanage <sup>1,†</sup> , Jeremie H. Estepp <sup>2,†</sup>, Kumar Srivastava <sup>1</sup>, Sara R. Rashkin <sup>3</sup>, Vivien A. Sheehan <sup>4</sup>, Jane S. Hankins <sup>3</sup>, Clifford M. Takemoto <sup>3</sup>, Yun Li <sup>5,6,7</sup>, Yuehua Cui <sup>8</sup>, Motomi Mori <sup>1</sup>, Stephen Burgess <sup>9,10</sup>, Michael R. DeBaun <sup>11</sup> and Guolian Kang <sup>1,\*</sup>

## S1. Method

### S1.1. Derivation of Relation in (6)

To simplify the derivation of the joint density (3) in evaluating likelihood (2), it is necessary to evaluate  $\Pr(S_i = 1|Z_i, G_i)$  using the relation (5). We start the derivation using (5) as below.

$$\begin{aligned} \Pr(S_i = 1|Z_i, G_i) &= \frac{1}{2\pi\sqrt{\sigma_{xx}\sigma_{yy}(1-\rho^2)}} \int_{\mathcal{Y}} \int_{-\infty}^{\infty} \exp \left\{ \frac{-1}{2(1-\rho^2)} \left[ \left( \frac{y - \beta_1^T Z_i - \beta_2 x}{\sqrt{\sigma_{yy}}} \right)^2 \right. \right. \\ &\quad \left. \left. + \left( \frac{x - \gamma_1^T Z_i - \gamma_2 G_i}{\sqrt{\sigma_{xx}}} \right)^2 - 2\rho \left( \frac{y - \beta_1^T Z_i - \beta_2 x}{\sqrt{\sigma_{yy}}} \right) \left( \frac{x - \gamma_1^T Z_i - \gamma_2 G_i}{\sqrt{\sigma_{xx}}} \right) \right] \right\} dx dy. \end{aligned} \quad (S1)$$

Let  $\theta_1 = \gamma_1^T Z_i + \gamma_2 G_i$  and  $\theta_2 = \beta_1^T Z_i$ . Then,

$$\begin{aligned} \Pr(S_i = 1|Z_i, G_i) &= \frac{1}{2\pi\sqrt{\sigma_{xx}\sigma_{yy}(1-\rho^2)}} \int_{\mathcal{Y}} \int_{-\infty}^{\infty} \exp \left\{ \frac{-1}{2(1-\rho^2)} \left[ \left( \frac{y - \theta_2 - \beta_2 x}{\sqrt{\sigma_{yy}}} \right)^2 + \left( \frac{x - \theta_1}{\sqrt{\sigma_{xx}}} \right)^2 \right. \right. \\ &\quad \left. \left. - 2\rho \left( \frac{y - \theta_2 - \beta_2 x}{\sqrt{\sigma_{yy}}} \right) \left( \frac{x - \theta_1}{\sqrt{\sigma_{xx}}} \right) \right] \right\} dx dy \\ &= \frac{1}{2\pi\sqrt{\sigma_{xx}\sigma_{yy}(1-\rho^2)}} \int_{\mathcal{Y}} \int_{-\infty}^{\infty} \exp \left\{ \frac{-1}{2(1-\rho^2)} \left[ \left( \frac{\sigma_{xx}\beta_2^2 + \sigma_{yy} + 2\rho\beta_2\sqrt{\sigma_{xx}\sigma_{yy}}}{\sigma_{xx}\sigma_{yy}} \right) x^2 \right. \right. \\ &\quad \left. \left. - 2 \left( \frac{\sigma_{xx}\beta_2[y - \theta_2] + \sigma_{yy}\theta_1 + \rho\sqrt{\sigma_{xx}\sigma_{yy}}[y - \theta_2 + \theta_1\beta_2]}{\sigma_{xx}\sigma_{yy}} \right) x + \frac{[y - \theta_2]^2}{\sigma_{yy}} + \frac{2\rho\theta_1}{\sqrt{\sigma_{xx}\sigma_{yy}}}[y - \theta_2] \right. \right. \\ &\quad \left. \left. + \frac{\theta_1^2}{\sigma_{xx}} \right] \right\} dx dy. \end{aligned} \quad (S2)$$

Let  $\mu = [(y - \theta_2)(\sigma_{xx}\beta_2 + \rho\sqrt{\sigma_{xx}\sigma_{yy}}) + \theta_1\sigma_{yy} + \rho\sqrt{\sigma_{xx}\sigma_{yy}}\theta_1\beta_2] / [\sigma_{xx}\beta_2^2 + \sigma_{yy} + 2\rho\beta_2\sqrt{\sigma_{xx}\sigma_{yy}}]$ . Then (S2) can be further simplified as

$$\begin{aligned}
& \Pr(S_i = 1 | \mathbf{Z}_i, G_i) \\
&= \frac{1}{2\pi\sqrt{\sigma_{xx}\sigma_{yy}(1-\rho^2)}} \int_{\mathcal{Y}} \int_{-\infty}^{\infty} \exp \left\{ \frac{-1}{2(1-\rho^2)} \left[ \left( \frac{\sigma_{xx}\beta_2^2 + \sigma_{yy} + 2\rho\beta_2\sqrt{\sigma_{xx}\sigma_{yy}}}{\sigma_{xx}\sigma_{yy}} \right) [x^2 - 2\mu x] \right. \right. \\
&\quad \left. \left. + \frac{[y - \theta_2]^2}{\sigma_{yy}} + \frac{2\rho\theta_1}{\sqrt{\sigma_{xx}\sigma_{yy}}} [y - \theta_2] + \frac{\theta_1^2}{\sigma_{xx}} \right] \right\} dx dy \\
&= \frac{1}{2\pi\sqrt{\sigma_{xx}\sigma_{yy}(1-\rho^2)}} \int_{\mathcal{Y}} \int_{-\infty}^{\infty} \exp \left\{ \frac{-1}{2(1-\rho^2)} \left[ \left( \frac{\sigma_{xx}\beta_2^2 + \sigma_{yy} + 2\rho\beta_2\sqrt{\sigma_{xx}\sigma_{yy}}}{\sigma_{xx}\sigma_{yy}} \right) [x - \mu]^2 \right. \right. \\
&\quad \left. \left. - \left( \frac{\sigma_{xx}\beta_2^2 + \sigma_{yy} + 2\rho\beta_2\sqrt{\sigma_{xx}\sigma_{yy}}}{\sigma_{xx}\sigma_{yy}} \right) \mu^2 + \frac{[y - \theta_2]^2}{\sigma_{xx}} + \frac{2\rho\theta_1}{\sqrt{\sigma_{xx}\sigma_{yy}}} [y - \theta_2] + \frac{\theta_1^2}{\sigma_{xx}} \right] \right\} dx dy \\
&= \frac{1}{2\pi\sqrt{\sigma_{xx}\sigma_{yy}(1-\rho^2)}} \int_{\mathcal{Y}} \int_{-\infty}^{\infty} \exp \left\{ \frac{-1}{2(1-\rho^2)} \left[ \left( \frac{\sigma_{xx}\beta_2^2 + \sigma_{yy} + 2\rho\beta_2\sqrt{\sigma_{xx}\sigma_{yy}}}{\sigma_{xx}\sigma_{yy}} \right) [x - \mu]^2 \right. \right. \\
&\quad \left. \left. + [y - \theta_2]^2 \left( \frac{1}{\sigma_{yy}} - \frac{[\sigma_{xx}\beta_2 + \rho\sqrt{\sigma_{xx}\sigma_{yy}}]^2}{\sigma_{xx}\sigma_{yy}[\sigma_{xx}\beta_2^2 + \sigma_{yy} + 2\rho\beta_2\sqrt{\sigma_{xx}\sigma_{yy}}]} \right) \right. \right. \\
&\quad \left. \left. - 2(y - \theta_2) \left( \frac{[\sigma_{yy}\theta_1 + \rho\theta_1\beta_2\sqrt{\sigma_{xx}\sigma_{yy}}][\sigma_{xx}\beta_2 + \rho\sqrt{\sigma_{xx}\sigma_{yy}}]}{\sigma_{xx}\sigma_{yy}[\sigma_{xx}\beta_2^2 + \sigma_{yy} + 2\rho\beta_2\sqrt{\sigma_{xx}\sigma_{yy}}]} - \frac{\rho\theta_1}{\sqrt{\sigma_{xx}\sigma_{yy}}} \right) + \frac{\theta_1^2}{\sigma_{xx}} \right. \right. \\
&\quad \left. \left. - \frac{[\sigma_{yy}\theta_1 + \rho\sqrt{\sigma_{xx}\sigma_{yy}}\theta_1\beta_2]^2}{\sigma_{xx}\sigma_{yy}[\sigma_{xx}\beta_2^2 + \sigma_{yy} + 2\rho\beta_2\sqrt{\sigma_{xx}\sigma_{yy}}]} \right] \right\} dx dy \\
&= \frac{1}{2\pi\sqrt{\sigma_{xx}\sigma_{yy}(1-\rho^2)}} \int_{\mathcal{Y}} \int_{-\infty}^{\infty} \exp \left\{ \frac{-1}{2(1-\rho^2)} \left[ \left( \frac{\sigma_{xx}\beta_2^2 + \sigma_{yy} + 2\rho\beta_2\sqrt{\sigma_{xx}\sigma_{yy}}}{\sigma_{xx}\sigma_{yy}} \right) [x - \mu]^2 \right. \right. \\
&\quad \left. \left. + \frac{1 - \rho^2}{\sigma_{xx}\beta_2^2 + \sigma_{yy} + 2\rho\beta_2\sqrt{\sigma_{xx}\sigma_{yy}}} [y - \theta_2 - \theta_1\beta_2]^2 \right] \right\} dx dy. \tag{S3}
\end{aligned}$$

Let  $\sigma_1^2 = (1 - \rho^2)\sigma_{xx}\sigma_{yy}/\sigma_2^2$  and  $\sigma_2^2 = \sigma_{xx}\beta_2^2 + \sigma_{yy} + 2\rho\beta_2\sqrt{\sigma_{xx}\sigma_{yy}}$ . Then, the above relation can be written as

$$\begin{aligned}
& \Pr(S_i = 1 | \mathbf{Z}_i, G_i) \\
&= \int_{-\infty}^{\infty} \frac{1}{\sqrt{2\pi\sigma_1^2}} \exp \left\{ -\frac{1}{2} \left( \frac{x - \mu}{\sigma_1} \right)^2 \right\} dx \int_{\mathcal{Y}} \frac{1}{\sqrt{2\pi\sigma_2^2}} \exp \left\{ -\frac{1}{2} \left( \frac{y - \theta_2 - \theta_1\beta_2}{\sigma_2} \right)^2 \right\} dy,
\end{aligned}$$

which is equivalent to

$$\begin{aligned}
& \Pr(S_i = 1 | \mathbf{Z}_i, G_i) \\
&= F_{(\theta_2 + \theta_1\beta_2, \sigma_2)}(y_1) - F_{(\theta_2 + \theta_1\beta_2, \sigma_2)}(y_0) + F_{(\theta_2 + \theta_1\beta_2, \sigma_2)}(y_3) - F_{(\theta_2 + \theta_1\beta_2, \sigma_2)}(y_2),
\end{aligned}$$

where  $F_{(\theta_2 + \theta_1\beta_2, \sigma_2)}(\cdot)$  is the normal cumulative distribution with mean  $\theta_2 + \theta_1\beta_2$  and standard deviation  $\sigma_2$ .

## S1.2. Figures and Tables

**Table S1.** Average estimators, average standard errors, bias percentages, rejection proportions, and coverage percentages obtained through MREPS and 2SLS under EPS<sup>X</sup> and random designs.

| Design           | Number of SNPs                                                              | $\beta_2$ | Mean $\hat{\beta}_2$ |        | Mean SE |      | Bias % |        | Rejection proportion |      | CP    |      |
|------------------|-----------------------------------------------------------------------------|-----------|----------------------|--------|---------|------|--------|--------|----------------------|------|-------|------|
|                  |                                                                             |           | MREPS                | 2SLS   | MREPS   | 2SLS | MREPS  | 2SLS   | MREPS                | 2SLS | MREPS | 2SLS |
| EPS <sup>x</sup> | (a) Equal- sized IV - risk factor associations                              |           |                      |        |         |      |        |        |                      |      |       |      |
|                  | 9                                                                           | 0         | 0.003                | 0.16   | 0.12    | 0.02 | -      | -      | 0.05                 | 1    | 95.1  | 0    |
|                  |                                                                             | 0.2       | 0.2                  | 0.36   | 0.12    | 0.02 | -1.31  | -79.43 | 0.41                 | 1    | 95    | 0    |
|                  |                                                                             | 0.4       | 0.4                  | 0.56   | 0.12    | 0.02 | -0.65  | -39.71 | 0.89                 | 1    | 95    | 0    |
|                  | 25                                                                          | 0         | 0.001                | 0.16   | 0.19    | 0.04 | -      | -      | 0.04                 | 0.99 | 95.8  | 1.2  |
|                  |                                                                             | 0.2       | 0.2                  | 0.36   | 0.19    | 0.04 | -0.34  | -80.43 | 0.21                 | 1    | 95.8  | 1.2  |
|                  |                                                                             | 0.4       | 0.4                  | 0.56   | 0.19    | 0.04 | -0.17  | -40.21 | 0.58                 | 1    | 95.7  | 1.2  |
|                  | (b) Different- sized IV - risk factor associations                          |           |                      |        |         |      |        |        |                      |      |       |      |
|                  | 9                                                                           | 0         | $6 \times 10^{-5}$   | 0.16   | 0.12    | 0.02 | -      | -      | 0.06                 | 1    | 94.5  | 0    |
|                  |                                                                             | 0.2       | 0.2                  | 0.36   | 0.12    | 0.02 | -0.03  | -79.12 | 0.4                  | 1    | 94.5  | 0    |
|                  |                                                                             | 0.4       | 0.4                  | 0.56   | 0.12    | 0.02 | -0.02  | -39.56 | 0.9                  | 1    | 94.5  | 0    |
|                  | 25                                                                          | 0         | -0.007               | 0.16   | 0.19    | 0.04 | -      | -      | 0.07                 | 0.98 | 93.5  | 2.2  |
|                  |                                                                             | 0.2       | 0.19                 | 0.36   | 0.19    | 0.04 | 3.4    | -79.84 | 0.22                 | 1    | 93.5  | 2.2  |
|                  |                                                                             | 0.4       | 0.39                 | 0.56   | 0.19    | 0.04 | 1.7    | -39.92 | 0.57                 | 1    | 93.6  | 2.2  |
|                  | (c) A combination of few large and many small IV - risk factor associations |           |                      |        |         |      |        |        |                      |      |       |      |
|                  | 9                                                                           | 0         | 0.006                | 0.16   | 0.09    | 0.02 | -      | -      | 0.05                 | 1    | 95.2  | 0    |
|                  |                                                                             | 0.2       | 0.21                 | 0.36   | 0.09    | 0.02 | -2.84  | -78.63 | 0.59                 | 1    | 95.2  | 0    |
|                  |                                                                             | 0.4       | 0.41                 | 0.56   | 0.09    | 0.02 | -1.42  | -39.32 | 0.98                 | 1    | 95.2  | 0    |
|                  | 25                                                                          | 0         | 0.002                | 0.15   | 0.08    | 0.02 | -      | -      | 0.05                 | 1    | 94.9  | 0    |
|                  |                                                                             | 0.3       | 0.2                  | 0.35   | 0.08    | 0.02 | -0.82  | -77.15 | 0.69                 | 1    | 94.9  | 0    |
|                  |                                                                             | 0.4       | 0.4                  | 0.55   | 0.08    | 0.02 | -0.41  | -38.57 | 0.99                 | 1    | 94.9  | 0    |
|                  | (d) A combination of valid and invalid IV - risk factor associations        |           |                      |        |         |      |        |        |                      |      |       |      |
|                  | 9                                                                           | 0         | -0.001               | 0.15   | 0.09    | 0.02 | -      | -      | 0.05                 | 1    | 95.3  | 0    |
|                  |                                                                             | 0.2       | 0.2                  | 0.35   | 0.09    | 0.02 | 0.52   | -77.43 | 0.63                 | 1    | 95.4  | 0    |
|                  |                                                                             | 0.4       | 0.4                  | 0.55   | 0.09    | 0.02 | 0.26   | -38.72 | 0.99                 | 1    | 95.4  | 0    |
|                  | 25                                                                          | 0         | 0.004                | 0.16   | 0.13    | 0.03 | -      | -      | 0.05                 | 1    | 95    | 0.1  |
|                  |                                                                             | 0.2       | 0.2                  | 0.36   | 0.13    | 0.03 | -2.01  | -79.89 | 0.36                 | 1    | 95.1  | 0.1  |
| 0.4              |                                                                             | 0.4       | 0.56                 | 0.13   | 0.03    | -1   | -39.94 | 0.86   | 1                    | 95.1 | 0.1   |      |
| Random           | (a) Equal- sized IV - risk factor associations                              |           |                      |        |         |      |        |        |                      |      |       |      |
|                  | 9                                                                           | 0         | -0.01                | -0.01  | 0.14    | 0.15 | -      | -      | 0.06                 | 0.03 | 94    | 96.9 |
|                  |                                                                             | 0.2       | 0.19                 | 0.19   | 0.14    | 0.15 | 4.14   | 5.59   | 0.36                 | 0.31 | 94.9  | 96.9 |
|                  |                                                                             | 0.4       | 0.39                 | 0.39   | 0.14    | 0.15 | 1.53   | 2.8    | 0.79                 | 0.75 | 94.6  | 96.9 |
|                  | 25                                                                          | 0         | -0.02                | -0.02  | 0.22    | 0.26 | -      | -      | 0.04                 | 0.03 | 95.6  | 97   |
|                  |                                                                             | 0.2       | 0.18                 | 0.18   | 0.22    | 0.26 | 12.48  | 10.52  | 0.26                 | 0.21 | 95.2  | 97   |
|                  |                                                                             | 0.4       | 0.38                 | 0.38   | 0.21    | 0.26 | 4.78   | 5.26   | 0.59                 | 0.52 | 94.7  | 97   |
|                  | (b) Different- sized IV - risk factor associations                          |           |                      |        |         |      |        |        |                      |      |       |      |
|                  | 9                                                                           | 0         | -0.008               | -0.008 | 0.13    | 0.14 | -      | -      | 0.05                 | 0.03 | 94.7  | 96.7 |
|                  |                                                                             | 0.2       | 0.2                  | 0.19   | 0.13    | 0.14 | 2.43   | 3.99   | 0.41                 | 0.36 | 95.2  | 96.7 |
|                  |                                                                             | 0.4       | 0.4                  | 0.39   | 0.13    | 0.14 | 0.71   | 2      | 0.84                 | 0.81 | 94.7  | 96.7 |
|                  | 25                                                                          | 0         | -0.02                | -0.02  | 0.23    | 0.26 | -      | -      | 0.05                 | 0.03 | 95.5  | 97.3 |
|                  |                                                                             | 0.2       | 0.18                 | 0.2    | 0.23    | 0.26 | 8.67   | 10.59  | 0.27                 | 0.23 | 95.7  | 97.3 |
|                  |                                                                             | 0.4       | 0.38                 | 0.4    | 0.22    | 0.26 | 3.82   | 5.29   | 0.59                 | 0.53 | 95.4  | 97.3 |
|                  | (c) A combination of few large and many small IV - risk factor associations |           |                      |        |         |      |        |        |                      |      |       |      |
|                  | 9                                                                           | 0         | -0.009               | -0.009 | 0.1     | 0.1  | -      | -      | 0.06                 | 0.05 | 93.7  | 95.3 |
|                  |                                                                             | 0.2       | 0.19                 | 0.19   | 0.1     | 0.1  | 2.91   | 4.44   | 0.54                 | 0.51 | 93.3  | 95.3 |
|                  |                                                                             | 0.4       | 0.4                  | 0.39   | 0.1     | 0.1  | 0.91   | 2.22   | 0.94                 | 0.92 | 93.5  | 95.3 |
|                  | 25                                                                          | 0         | -0.003               | -0.002 | 0.09    | 0.09 | -      | -      | 0.06                 | 0.04 | 94.6  | 96   |
|                  |                                                                             | 0.3       | 0.2                  | 0.2    | 0.09    | 0.09 | -0.4   | 1.2    | 0.63                 | 0.6  | 94.9  | 96   |
|                  |                                                                             | 0.4       | 0.4                  | 0.4    | 0.09    | 0.09 | -0.66  | 0.6    | 0.98                 | 0.98 | 94.4  | 96   |
|                  | (d) A combination of valid and invalid IV - risk factor associations        |           |                      |        |         |      |        |        |                      |      |       |      |
|                  | 9                                                                           | 0         | -0.007               | -0.007 | 0.09    | 0.1  | -      | -      | 0.06                 | 0.04 | 94.5  | 95.8 |
|                  |                                                                             | 0.2       | 0.2                  | 0.19   | 0.09    | 0.1  | 1.73   | 3.29   | 0.58                 | 0.55 | 94.3  | 95.8 |
|                  |                                                                             | 0.4       | 0.4                  | 0.39   | 0.09    | 0.1  | 0.32   | 1.64   | 0.96                 | 0.95 | 94.7  | 95.8 |
|                  | 25                                                                          | 0         | -0.006               | -0.005 | 0.15    | 0.16 | -      | -      | 0.05                 | 0.04 | 94.6  | 95.9 |
|                  |                                                                             | 0.2       | 0.2                  | 0.19   | 0.15    | 0.16 | 1.15   | 2.65   | 0.38                 | 0.35 | 93.3  | 95.9 |
| 0.4              |                                                                             | 0.4       | 0.39                 | 0.15   | 0.16    | 0.1  | 1.32   | 0.76   | 0.74                 | 93.7 | 95.9  |      |

SE = Standard Error; CP = Coverage Percentage.

## S2. Real Data Application

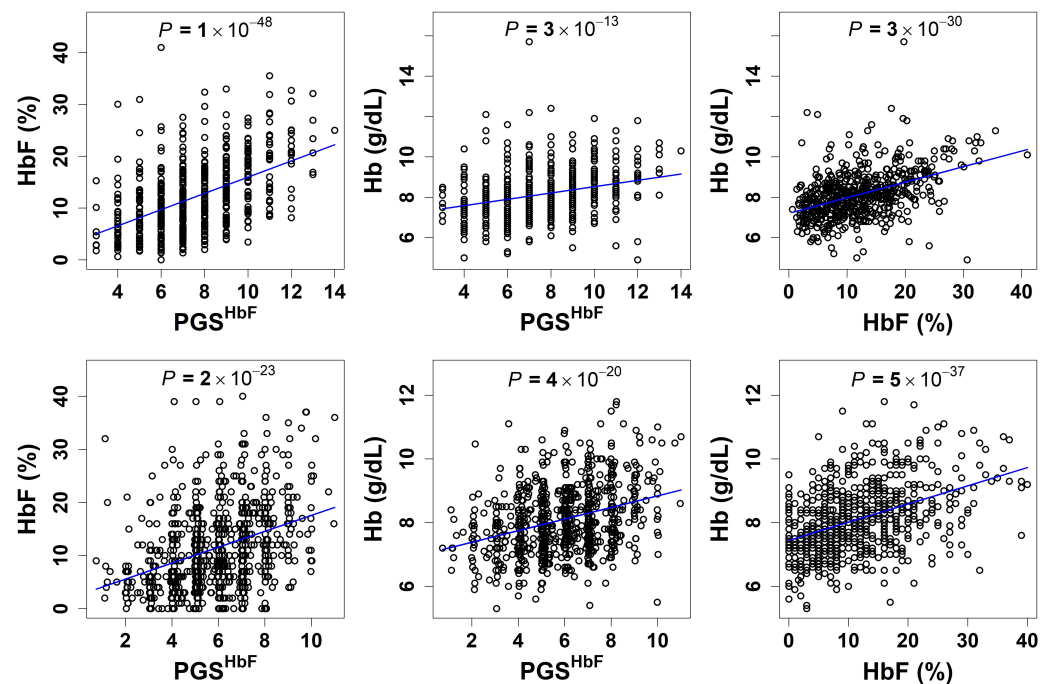

**Figure S1.** Top panel: Comparison between the effects of  $PGS^{HbF}$  on HbF and Hb and correlation between HbF and Hb in SCCRIP/BCM cohort. The p values were calculated using linear regression model, adjusting for covariates of cubic-spline-defined age, sex, site location, transfusion history (Yes/No), SS or SB0, and top 5 PCs. Bottom panel: Comparison between the effects of  $PGS^{HbF}$  on HbF and Hb and correlation between HbF and Hb in SIT cohort. The p values were calculated using linear regression model, adjusting for covariates of cubic-spline-defined age, sex, sickle diagnosis (Yes/No), SS or SB0, and top 5 PCs. SCCRIP/BMC = Sickle Cell Clinical Research Intervention Program study and Baylor College of Medicine; SIT = Silent Cerebral Infarct Transfusion trial.

**Table S2.** MR analyses to assess the causal effect of HbF on Hb of patients from two cohorts of SCCRIP/BCM and SIT. Instrumental variables are 10 different SNPs.

| Cohort/Design    | IV         | $\hat{\beta}_2$ |        | SE ( $\hat{\beta}_2$ ) |       | p-Value ( $\beta_2$ ) |                     | $\hat{\gamma}_2$ |      | SE ( $\hat{\gamma}_2$ ) |      | p-Value ( $\gamma_2$ ) |      |
|------------------|------------|-----------------|--------|------------------------|-------|-----------------------|---------------------|------------------|------|-------------------------|------|------------------------|------|
|                  |            | MREPS           | 2SLS   | MREPS                  | 2SLS  | MREPS                 | 2SLS                | MREPS            | 2SLS | MREPS                   | 2SLS | MREPS                  | 2SLS |
| SCCRIP/BCM       | rs7606173  | 0.046           | 0.045  | 0.019                  | 0.02  | 0.012                 | 0.023               | −3.3             | -    | 0.33                    | -    | 0                      | -    |
|                  | rs6738440  | 0.087           | 0.084  | 0.026                  | 0.029 | $8 \times 10^{-4}$    | 0.0038              | −2.4             | -    | 0.33                    | -    | $3 \times 10^{-13}$    | -    |
|                  | rs9494142  | 0.15            | 0.14   | 0.025                  | 0.027 | $3 \times 10^{-9}$    | $2 \times 10^{-7}$  | 3.5              | -    | 0.44                    | -    | $2 \times 10^{-15}$    | -    |
|                  | rs9389268  | 0.21            | 0.2    | 0.077                  | 0.08  | 0.0074                | 0.011               | 1.3              | -    | 0.47                    | -    | 0.0061                 | -    |
|                  | rs61028892 | 0.09            | 0.089  | 0.02                   | 0.023 | $9 \times 10^{-6}$    | $1 \times 10^{-4}$  | 8.5              | -    | 0.98                    | -    | 0                      | -    |
|                  | rs66650371 | 0.16            | 0.16   | 0.037                  | 0.042 | $1 \times 10^{-5}$    | $1 \times 10^{-4}$  | 3.3              | -    | 0.6                     | -    | $2 \times 10^{-8}$     | -    |
|                  | rs968857   | 0.15            | 0.15   | 0.056                  | 0.073 | 0.0064                | 0.042               | −1.1             | -    | 0.37                    | -    | 0.0023                 | -    |
|                  | rs10128556 | 0.097           | 0.095  | 0.027                  | 0.036 | $4 \times 10^{-4}$    | 0.009               | 3.1              | -    | 0.58                    | -    | $1 \times 10^{-7}$     | -    |
|                  | rs28440105 | 0.12            | 0.12   | 0.054                  | 0.081 | 0.029                 | 0.15                | −1.9             | -    | 0.73                    | -    | 0.011                  | -    |
|                  | rs3834466  | 0.46            | 1.6    | 0.11                   | 9.3   | $3 \times 10^{-5}$    | 0.86                | 0.75             | -    | 0.57                    | -    | 0.19                   | -    |
| SIT              | rs7606173  | 0.13            | 0.12   | 0.019                  | 0.023 | $8 \times 10^{-12}$   | $6 \times 10^{-8}$  | −3.1             | -    | 0.47                    | -    | $4 \times 10^{-11}$    | -    |
|                  | rs6738440  | 0.18            | 0.18   | 0.05                   | 0.056 | $3 \times 10^{-4}$    | 0.0014              | −1.9             | -    | 0.57                    | -    | $9 \times 10^{-4}$     | -    |
|                  | rs9494142  | 0.14            | 0.14   | 0.048                  | 0.053 | 0.0028                | 0.0081              | 2.1              | -    | 0.75                    | -    | 0.0061                 | -    |
|                  | rs9389268  | 0.42            | 4.6    | 0.087                  | 130   | $2 \times 10^{-6}$    | 0.97                | −0.23            | -    | 0.2                     | -    | 0.25                   | -    |
|                  | rs61028892 | 0.11            | 0.11   | 0.037                  | 0.039 | 0.0028                | 0.0056              | 6.5              | -    | 1.7                     | -    | $2 \times 10^{-4}$     | -    |
|                  | rs968857   | 0.025           | 0.024  | 0.047                  | 0.057 | 0.59                  | 0.67                | −1.3             | -    | 0.66                    | -    | 0.051                  | -    |
|                  | rs10128556 | 0.17            | 0.17   | 0.029                  | 0.093 | $2 \times 10^{-9}$    | 0.068               | 1.5              | -    | 0.68                    | -    | 0.024                  | -    |
|                  | rs28440105 | 0.052           | 0.05   | 0.034                  | 0.039 | 0.13                  | 0.2                 | −3.5             | -    | 1.1                     | -    | 0.0014                 | -    |
|                  | rs3834466  | 0.28            | 0.28   | 0.16                   | 0.26  | 0.077                 | 0.29                | 2.5              | -    | 1.8                     | -    | 0.16                   | -    |
| Combined         | rs7606173  | 0.08            | 0.079  | 0.01                   | 0.012 | $1 \times 10^{-14}$   | $8 \times 10^{-11}$ | −3.4             | -    | 0.21                    | -    | 0                      | -    |
|                  | rs6738440  | 0.1             | 0.1    | 0.018                  | 0.018 | $3 \times 10^{-9}$    | $1 \times 10^{-8}$  | −2.6             | -    | 0.25                    | -    | 0                      | -    |
|                  | rs9494142  | 0.14            | 0.14   | 0.02                   | 0.022 | $7 \times 10^{-12}$   | $6 \times 10^{-10}$ | 2.9              | -    | 0.35                    | -    | $1 \times 10^{-16}$    | -    |
|                  | rs9389268  | 0.078           | 0.077  | 0.041                  | 0.042 | 0.054                 | 0.067               | 0.96             | -    | 0.24                    | -    | $7 \times 10^{-5}$     | -    |
|                  | rs61028892 | 0.089           | 0.088  | 0.018                  | 0.018 | $5 \times 10^{-7}$    | $2 \times 10^{-6}$  | 7.6              | -    | 0.83                    | -    | 0                      | -    |
|                  | rs968857   | 0.082           | 0.081  | 0.039                  | 0.042 | 0.034                 | 0.056               | −1.2             | -    | 0.28                    | -    | $1 \times 10^{-5}$     | -    |
|                  | rs10128556 | 0.1             | 0.099  | 0.026                  | 0.028 | $1 \times 10^{-4}$    | $5 \times 10^{-4}$  | 2.4              | -    | 0.33                    | -    | $2 \times 10^{-12}$    | -    |
|                  | rs28440105 | 0.095           | 0.093  | 0.046                  | 0.055 | 0.039                 | 0.088               | −1.8             | -    | 0.52                    | -    | $5^{-4}$               | -    |
|                  | rs3834466  | 0.3             | 0.29   | 0.13                   | 0.2   | 0.018                 | 0.14                | 1.4              | -    | 0.91                    | -    | 0.13                   | -    |
| EPS <sup>y</sup> | rs7606173  | 0.1             | 0.099  | 0.016                  | 0.018 | $8 \times 10^{-10}$   | $4 \times 10^{-8}$  | −3.6             | -    | 0.39                    | -    | 0                      | -    |
|                  | rs6738440  | 0.12            | 0.12   | 0.025                  | 0.027 | $6 \times 10^{-7}$    | $1 \times 10^{-5}$  | −2.7             | -    | 0.46                    | -    | $2 \times 10^{-9}$     | -    |
|                  | rs9494142  | 0.12            | 0.12   | 0.026                  | 0.028 | $2 \times 10^{-6}$    | $1 \times 10^{-5}$  | 3.4              | -    | 0.58                    | -    | $6 \times 10^{-9}$     | -    |
|                  | rs9389268  | 0.22            | −0.069 | 0.014                  | 0.32  | 0                     | 0.83                | −0.043           | -    | 0.28                    | -    | 0.88                   | -    |
|                  | rs61028892 | 0.1             | 0.1    | 0.024                  | 0.031 | $3 \times 10^{-5}$    | 0.0011              | 7.3              | -    | 1.6                     | -    | $7 \times 10^{-6}$     | -    |
|                  | rs968857   | 0.15            | 0.15   | 0.073                  | 0.11  | 0.039                 | 0.17                | −0.84            | -    | 0.48                    | -    | 0.08                   | -    |
|                  | rs10128556 | 0.089           | 0.089  | 0.041                  | 0.046 | 0.03                  | 0.055               | 2.2              | -    | 0.54                    | -    | $7 \times 10^{-5}$     | -    |
|                  | rs28440105 | 0.093           | 0.09   | 0.12                   | 0.15  | 0.43                  | 0.55                | −0.99            | -    | 0.9                     | -    | 0.27                   | -    |
|                  | rs3834466  | 0.029           | 0.029  | 0.14                   | 0.15  | 0.84                  | 0.85                | −1.7             | -    | 1.7                     | -    | 0.34                   | -    |
| EPS <sup>x</sup> | rs7606173  | 0.074           | 0.08   | 0.013                  | 0.019 | $2 \times 10^{-8}$    | $3 \times 10^{-5}$  | −4.9             | -    | 0.61                    | -    | $2 \times 10^{-15}$    | -    |
|                  | rs6738440  | −0.37           | 0.11   | 0.047                  | 0.034 | $8 \times 10^{-15}$   | $8 \times 10^{-4}$  | 0.11             | -    | 0.17                    | -    | 0.53                   | -    |
|                  | rs9494142  | −1              | 0.13   | 0.082                  | 0.033 | 0                     | $1 \times 10^{-4}$  | −0.14            | -    | 0.087                   | -    | 0.1                    | -    |
|                  | rs9389268  | −0.36           | −0.15  | 0.023                  | 0.27  | 0                     | 0.57                | 0.24             | -    | 0.14                    | -    | 0.076                  | -    |
|                  | rs61028892 | −0.91           | 0.12   | 0.11                   | 0.038 | 0                     | 0.0019              | −0.27            | -    | 0.25                    | -    | 0.29                   | -    |
|                  | rs968857   | −0.37           | 0.067  | 0.011                  | 0.095 | 0                     | 0.48                | −0.048           | -    | 0.18                    | -    | 0.79                   | -    |
|                  | rs10128556 | −0.41           | 0.12   | 0.0082                 | 0.057 | 0                     | 0.042               | −0.096           | -    | 0.21                    | -    | 0.65                   | -    |
|                  | rs28440105 | −0.38           | 0.081  | 0.0077                 | 0.13  | 0                     | 0.53                | −0.027           | -    | 0.33                    | -    | 0.93                   | -    |
|                  | rs3834466  | −0.32           | −0.15  | 0.033                  | 0.21  | 0                     | 0.48                | −1.2             | -    | 0.55                    | -    | 0.024                  | -    |

SE = Standard Error; SCCRIP/BCM: Sickle Cell Clinical Research Intervention Program study and Baylor College of Medicine; SIT = Silent Cerebral Infarct Transfusion trial; HbF = total fetal hemoglobin; PGS<sup>HbF</sup> = Polygenic Score of HbF.

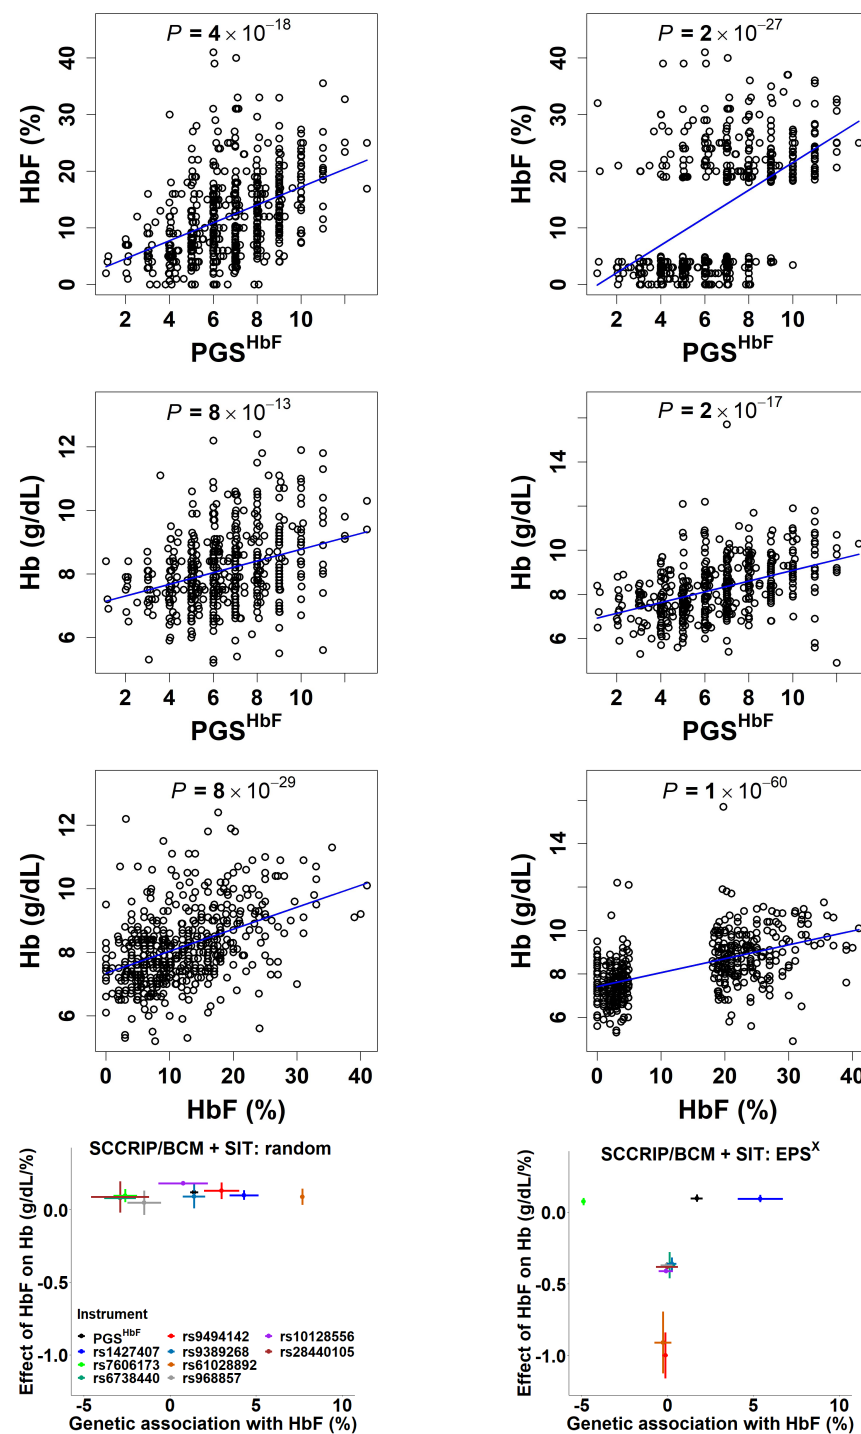

**Figure S2.** Top left and right panels: comparison between the effects of  $PGS^{HbF}$  on HbF and Hb in random sample and  $EPS^Y$  derived from SCCRIP/BCM and SIT combined cohort, respectively. The p values were calculated using linear regression model, adjusting for covariates of cubic-spline-defined age, sex, sickle diagnosis (Yes/No), and top 5 PCs. Bottom panel: HbF induced by *BCL11A* and *HBS1L – MYB* causally influences Hb in random sample (left) and  $EPS^Y$  (right) patients. X-axis: Genetic association with HbF (%). Y-axis: (Causal) Effect of HbF on Hb (g/dL/%). SCCRIP/BMC = Sickle Cell Clinical Research Intervention Program study and Baylor College of Medicine; SIT = Silent Cerebral Infarct Transfusion trial.

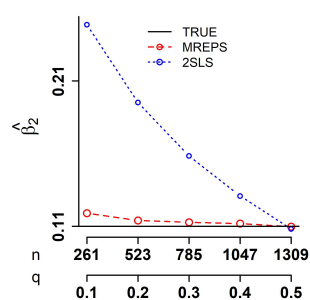

**Figure S3.** The behavior of the estimators, due to the change of sample size or the proportion of the extreme tails, obtained through MREPS and 2SLS under the EPS<sup>Y</sup>.

**Table S3.** Average estimators, average standard errors, bias percentages, rejection proportions, and coverage percentages obtained through MREPS and 2SLS under EPS<sup>Y</sup> design.

| <i>n</i> | <i>q</i> | $\beta_2$ | Mean $\hat{\beta}_2$ |       | Mean SE |       | Bias % |        | Rejection proportion |      | CP    |      |
|----------|----------|-----------|----------------------|-------|---------|-------|--------|--------|----------------------|------|-------|------|
|          |          |           | MREPS                | 2SLS  | MREPS   | 2SLS  | MREPS  | 2SLS   | MREPS                | 2SLS | MREPS | 2SLS |
| 261      | 0.1      | 0.11      | 0.117                | 0.212 | 0.051   | 0.090 | −6.28  | −93.02 | 0.6                  | 0.7  | 94.3  | 74.8 |
| 523      | 0.2      | 0.11      | 0.113                | 0.178 | 0.039   | 0.060 | −3.15  | −61.69 | 0.8                  | 0.8  | 93.7  | 75.4 |
| 785      | 0.3      | 0.11      | 0.112                | 0.150 | 0.035   | 0.046 | −1.99  | −36.26 | 0.9                  | 0.9  | 93.5  | 83.6 |
| 1047     | 0.4      | 0.11      | 0.111                | 0.127 | 0.033   | 0.038 | −1.22  | −15.89 | 0.9                  | 0.9  | 93.7  | 90.7 |
| 1309     | 0.5      | 0.11      | 0.110                | 0.109 | 0.032   | 0.032 | −0.10  | 1.18   | 0.9                  | 0.9  | 94.9  | 95.4 |

SE = Standard Error, CP = Coverage Percentage.
